# Supplementary material
Source: publisher figshare collection journal article supplement (https://gsapubs.figshare.com/ndownloader/files/22745081)
Supplement: Supplementary file 1 [file 22745081]

## Table of Argon Data

## Table: Ar-Ar data

| Power <sup>a</sup>                                                  | Volume<br>x10 <sup>-11</sup> cc | <sup>39</sup> Ar | <sup>36</sup> Ar/ <sup>39</sup> Ar | <sup>37</sup> Ar/ <sup>39</sup> Ar | <sup>38</sup> Ar/ <sup>39</sup> Ar | <sup>40</sup> Ar/ <sup>39</sup> Ar | % <sup>40</sup> Ar<br>ATM | * <sup>40</sup> Ar/ <sup>39</sup> Ar | f <sub>39</sub> <sup>b</sup><br>(%) | Apparent Age<br>Ma <sup>c</sup> |
|---------------------------------------------------------------------|---------------------------------|------------------|------------------------------------|------------------------------------|------------------------------------|------------------------------------|---------------------------|--------------------------------------|-------------------------------------|---------------------------------|
| <b>01JM1399 Muscovite; J=.00290690 (Z7431; 45.9779°N 71.2781°E)</b> |                                 |                  |                                    |                                    |                                    |                                    |                           |                                      |                                     |                                 |
| <i>Aliquot: A</i>                                                   |                                 |                  |                                    |                                    |                                    |                                    |                           |                                      |                                     |                                 |
| 2                                                                   | 0.0236                          | 0.0719±0.089     | 26.833±13.94                       | 0.123±0.068                        | 123.647±20.32                      | 21.8                               | 96.647±25.184             | 0                                    | 446.68±103.28                       |                                 |
| 2.4                                                                 | 0.3101                          | 0.0142±0.008     | 3.352±1.044                        | 0.015±0.011                        | 84.459±1.801                       | 4.9                                | 80.349±2.022              | 0.5                                  | 378.69±8.60                         |                                 |
| 2.8                                                                 | 1.0198                          | 0.0012±0.003     | 1.028±0.680                        | -0.002±-0.011                      | 91.645±0.899                       | 0.3                                | 91.340±1.159              | 1.7                                  | 424.83±4.80                         |                                 |
| 3                                                                   | 9.2711                          | 0.0005±0.000     | 0.030±0.030                        | 0.003±0.011                        | 99.313±0.329                       | 0.1                                | 99.181±0.330              | 15.9                                 | 457.03±1.35                         |                                 |
| 3.5                                                                 | 3.9603                          | 0.0007±0.000     | 0.582±0.075                        | 0.003±0.011                        | 101.628±0.599                      | 0.2                                | 101.446±0.613             | 6.8                                  | 466.22±2.48                         |                                 |
| 3.9                                                                 | 4.05                            | 0.0009±0.000     | 0.215±0.108                        | 0.003±0.011                        | 101.849±0.382                      | 0.2                                | 101.597±0.397             | 6.9                                  | 466.84±1.61                         |                                 |
| 4.2                                                                 | 0.9966                          | 0.0004±0.001     | 0.879±0.748                        | -0.002±-0.011                      | 102.227±0.948                      | 0                                  | 102.222±0.972             | 1.7                                  | 469.36±3.93                         |                                 |
| 5                                                                   | 7.3657                          | 0.0012±0.000     | 0.197±0.031                        | 0.002±0.011                        | 102.012±0.346                      | 0.4                                | 101.655±0.349             | 12.6                                 | 467.07±1.41                         |                                 |
| 12                                                                  | 1.8798                          | 0.0000±0.001     | 0.914±0.310                        | 0.003±0.011                        | 101.558±0.635                      | 0                                  | 101.579±0.675             | 3.2                                  | 466.76±2.73                         |                                 |
| <i>Aliquot: B</i>                                                   |                                 |                  |                                    |                                    |                                    |                                    |                           |                                      |                                     |                                 |
| 2                                                                   | 0.0435                          | 0.0841±0.023     | 10.897±12.40                       | 0.017±0.029                        | 106.445±8.305                      | 19.9                               | 85.315±9.560              | 0.1                                  | 399.68±40.19                        |                                 |
| 2.4                                                                 | 0.2277                          | 0.0079±0.006     | 2.486±2.127                        | 0.002±0.012                        | 87.592±1.550                       | 1.3                                | 86.466±2.282              | 0.4                                  | 404.51±9.56                         |                                 |
| 2.8                                                                 | 1.7732                          | 0.0045±0.000     | 0.104±0.211                        | 0.002±0.011                        | 94.725±0.667                       | 1.2                                | 93.553±0.681              | 3                                    | 433.97±2.81                         |                                 |
| 3                                                                   | 14.7516                         | 0.0010±0.000     | 0.412±0.179                        | 0.003±0.011                        | 100.508±0.537                      | 0.3                                | 100.227±0.548             | 25.2                                 | 461.28±2.23                         |                                 |
| 3.5                                                                 | 4.3437                          | 0.0005±0.000     | 0.018±0.103                        | 0.001±0.011                        | 101.811±0.432                      | 0.1                                | 101.721±0.435             | 7.4                                  | 467.34±1.76                         |                                 |
| 3.9                                                                 | 4.7388                          | 0.0002±0.000     | 0.194±0.089                        | 0.002±0.011                        | 101.689±0.365                      | 0                                  | 101.696±0.371             | 8.1                                  | 467.24±1.50                         |                                 |
| 4.2                                                                 | 2.274                           | 0.0011±0.000     | 0.128±0.150                        | 0.001±0.011                        | 101.716±0.575                      | 0.2                                | 101.506±0.578             | 3.9                                  | 466.47±2.34                         |                                 |
| 5                                                                   | 0.8125                          | 0.0013±0.000     | 0.283±0.676                        | -0.002±-0.011                      | 101.990±1.318                      | 0                                  | 101.959±1.334             | 1.4                                  | 468.30±5.39                         |                                 |
| 12                                                                  | 0.6248                          | 0.0000±0.001     | 0.012±0.727                        | -0.003±-0.011                      | 101.499±1.197                      | 0                                  | 101.455±1.224             | 1.1                                  | 466.26±4.96                         |                                 |

a: As measured by laser in % of full nominal power (10W)

b: Fraction <sup>39</sup>Ar as percent of total run

c: Errors are analytical only and do not reflect error in irradiation parameter J

d: Nominal J, referenced to FCT-SAN=28.03 Ma (Renne et al., 1994)

All uncertainties quoted at 2σ level

## ANALYTICAL PROCEDURES

Samples were processed for Ar isotopic analysis by standard mineral separation techniques, including hand-picking of clear, unaltered muscovite crystals in the size range of 0.5 to 1 mm. Individual mineral separates were loaded into aluminum foil packets along with a single grain of Fish Canyon Tuff Sanidine (FCT-SAN) to act as flux monitor (apparent age = 28.03 Ma; Renne et al., 1998). Laser  $^{40}\text{Ar}/^{39}\text{Ar}$  step-heating analysis was carried out at the Geochronology Laboratory of the Geological Survey of Canada (Ottawa). Details of Ar data collection protocols can be found in Villeneuve and MacIntyre (1997) and Villeneuve *et al.* (2000). Error analysis on individual steps follows numerical error analysis routines outlined in Scaillet (2000); error analysis on grouped data follows algebraic methods of Roddick (1988). Corrected isotopic data are presented here as spectra of gas release normalized to total amount of  $^{39}\text{Ar}$  released (Fig. 11) and include J-factor error of 0.6% (Table \*). All errors are reported at  $2\sigma$  level of uncertainty and do not include errors from primary calibration of standard or decay constants.

## REFERENCES

- Renne P. R., Swisher C. C., Deino A. L., Karner D. B., Owens T. L., and DePaolo D. J., 1998a. Intercalibration of standards, absolute ages and uncertainties in  $^{40}\text{Ar}/^{39}\text{Ar}$  dating: Chemical Geology, v. 145, p. 117-152.
- Roddick, J.C., 1988. The assessment of errors in  $^{40}\text{Ar}/^{39}\text{Ar}$  dating. In: Radiogenic Age and Isotopic Studies, Report 2. Geological Survey of Canada, Paper 88-2, pp. 7-16.
- Scaillet, S., 2000. Numerical error analysis in  $^{40}\text{Ar}/^{39}\text{Ar}$  dating: Chemical Geology, v. 162, p. 269-298.
- Villeneuve, M.E. and MacIntyre, D.G., 1997. Laser  $^{40}\text{Ar}/^{39}\text{Ar}$  ages of the Babine porphyries and Newman volcanics, Fulton Lake map area, west-central British Columbia. In: Radiogenic Age and Isotopic Studies, Report 10. Geological Survey of Canada, Current Research 1997-F, pp. 131-139.
- Villeneuve, M.E., Sandeman, H.A. and Davies, W.J., 2000. A method for the intercalibration of U-Th-Pb and  $^{40}\text{Ar}/^{39}\text{Ar}$  ages in the Phanerozoic: Geochemica and Cosmochemica Acta, v. 64, p. 4017-4030.
